# Supplementary material for: A dual-mode mobile phone microscope using the onboard camera flash and ambient light
Source: PubMed Central journal article supplement (PMC5818495; doi:10.1038/s41598-018-21543-2), 2018-02-19
Supplement: 41598_2018_21543_MOESM8_ESM.pdf [file 41598_2018_21543_MOESM8_ESM.pdf]

## **Supplementary Information: A dual-mode mobile phone microscope using the onboard camera flash and ambient light**

A. Orth,<sup>a</sup> E. R. Wilson<sup>a</sup>, J. G. Thompson<sup>b</sup> and B. C. Gibson<sup>a</sup>

<sup>a</sup>ARC Centre of Excellence for Nanoscale BioPhotonics, School of Science, RMIT University, Melbourne, Australia

<sup>b</sup>ARC Centre of Excellence for Nanoscale BioPhotonics, Robinson Research Institute, School of Medicine, The University of Adelaide, Adelaide, Australia

### **Caco-2 sample preparation**

A culture of human colon colorectal cells Caco-2, HTB-37™ (ATCC, Manassa, VA, USA) was maintained using the ATCC standard culture method for this cell line. Briefly, the cells were incubated at 37°C with 5% CO<sub>2</sub> in Dulbecco's Modified Eagle Media (DMEM, Gibco™, USA) containing 100 U/mL penicillin-streptomycin and 10% fetal bovine serum (FBS, Sigma-Aldrich, USA). Subculture was performed when cells were 80% confluent by using 0.25% Trypsin (Sigma-Aldrich, USA) for 5-10 minutes at 37°C and centrifugation at 200 x g at 4°C for 5 minutes.

Low passage number Caco-2 cells were grown on coverslips at a density of  $2 \times 10^5$  cells per cover glass, using the same conditions as above and incubated overnight (18 hours). Cells were incubated at room temperature (19 °C±1) for 10 minutes with 10% formalin neutral buffered solution (Sigma-Aldrich, USA). The cells were washed three times with phosphate buffered saline pH7 (PBS, Gibco™, USA) before mounting in a PBS solution containing 10% Glycerol (Sigma-Aldrich, USA).
